# Supplementary material for: Worse than nothing at all: the inequality of fusions joining autosomes to the PAR and non-PAR portions of sex chromosomes
Source: PeerJ journal article supplement (doi:10.7717/peerj.17740), 2024-07-23

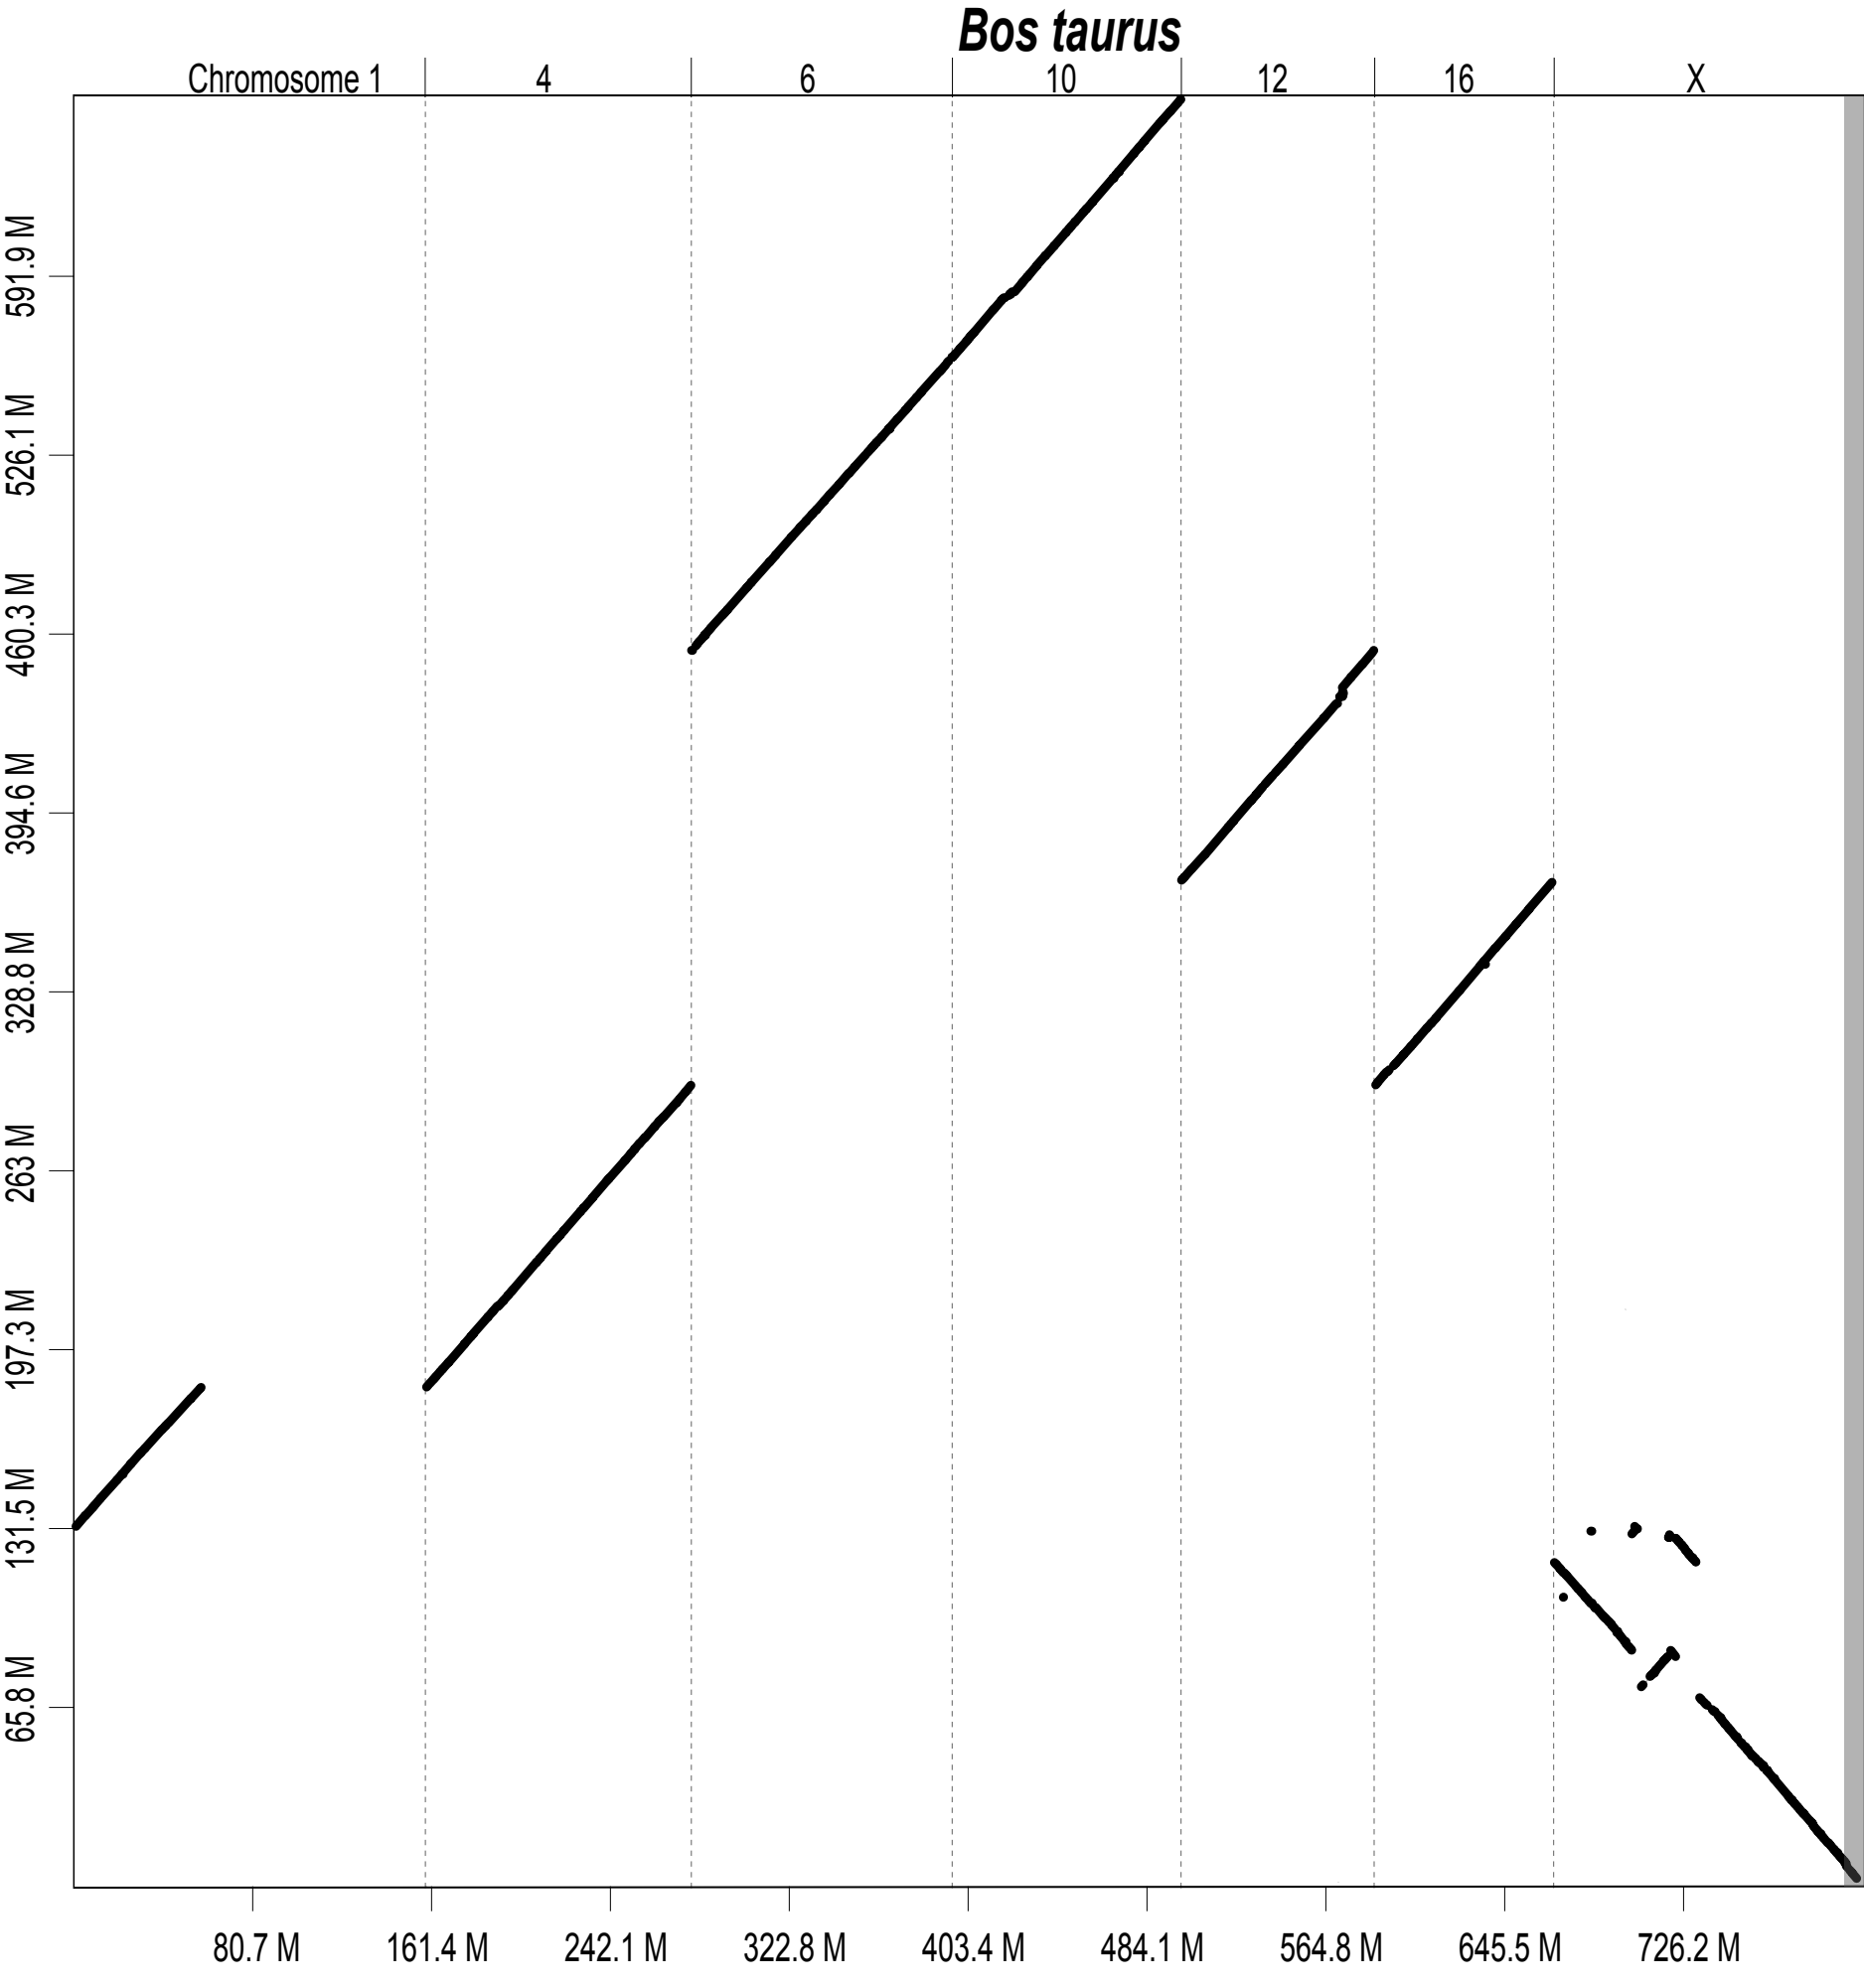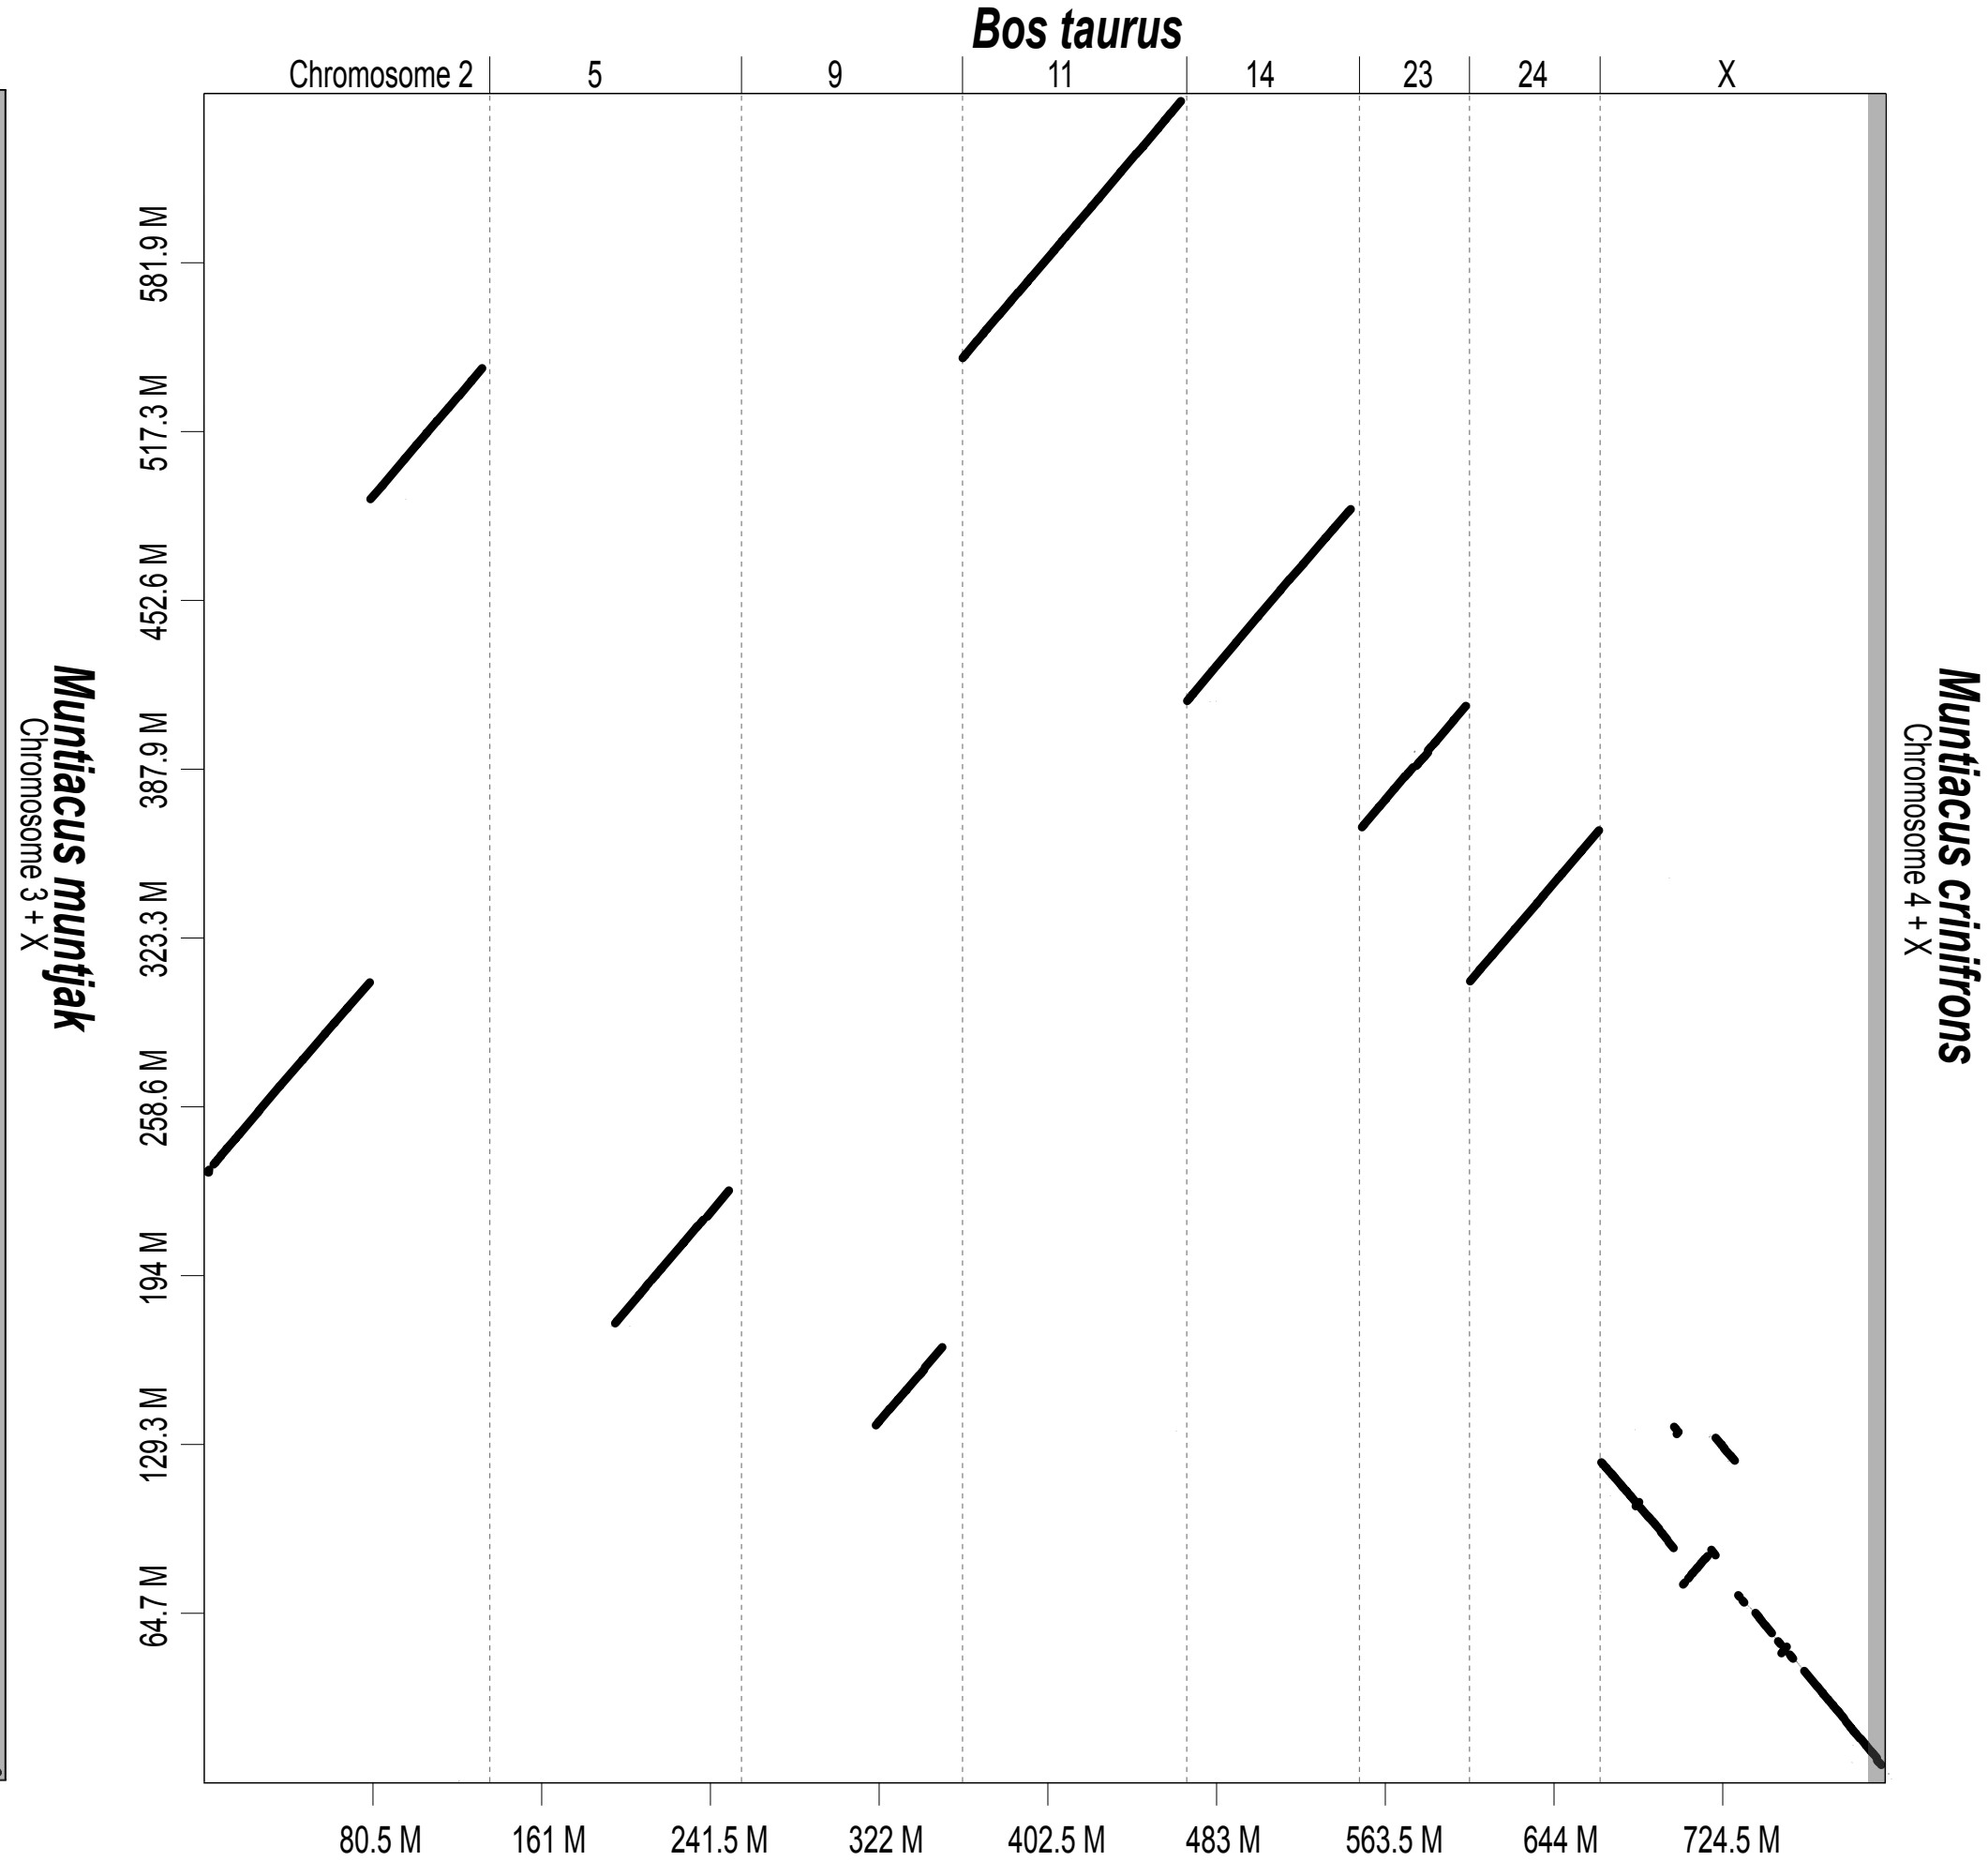

Supplement: Supplemental_Figure_1.pdf [file Supplemental_Figure_1.pdf]
